1 **Rab11a mediates cell-cell spread and reassortment of influenza A virus genomes**  
2 **via tunneling nanotubes.**

3 *Ketaki Ganti*<sup>1\*</sup>, *Julianna Han*<sup>2#</sup>, *Balaji Manicassamy*<sup>2</sup>, *Anice C. Lowen*<sup>1, 3\*</sup>

4 1 Department of Microbiology and Immunology, Emory University School of Medicine, Atlanta, GA, USA

5 2 Department of Microbiology and Immunology, University of Iowa School of Medicine, Iowa City, IA

6 3 Emory-UGA Centers of Excellence for Influenza Research and Surveillance (CEIRS)

7 # Current address: Department of Integrative Structural and Computational Biology, The Scripps Research  
8 Institute, La Jolla, CA, USA

9 \*Corresponding Authors

10 Email: [ketaki.ganti@emory.edu](mailto:ketaki.ganti@emory.edu); [anice.lowen@emory.edu](mailto:anice.lowen@emory.edu)

11

12

13

14

15

16

17

18

19 **Abstract:**

20 Influenza A virus (IAV) genomes comprise eight negative strand RNAs packaged into virions in the  
21 form of viral ribonucleoproteins (vRNPs). Rab11a plays a crucial role in the transport of vRNPs  
22 from the nucleus to the plasma membrane via microtubules, allowing assembly and virus  
23 production. Here, we identify a novel function for Rab11a in the inter-cellular transport of IAV  
24 vRNPs using tunneling nanotubes (TNTs) as molecular highways. TNTs are F-Actin rich tubules  
25 that link the cytoplasm of nearby cells. In IAV-infected cells, Rab11a was visualized together with  
26 vRNPs in these actin-rich intercellular connections. To better examine viral spread via TNTs, we  
27 devised an infection system in which conventional, virion-mediated, spread was not possible.  
28 Namely, we generated HA-deficient reporter viruses which are unable to produce progeny virions  
29 but whose genomes can be replicated and trafficked. In this system, vRNP transfer to neighboring  
30 cells was observed and this transfer was found to be dependent on both actin and Rab11a.  
31 Generation of infectious virus via TNT transfer was confirmed using donor cells infected with HA-  
32 deficient virus and recipient cells stably expressing HA protein. Mixing donor cells infected with  
33 genetically distinct IAVs furthermore revealed the potential for Rab11a and TNTs to serve as a  
34 conduit for genome mixing and reassortment in IAV infections. These data therefore reveal a  
35 novel role for Rab11a in the IAV life cycle, which could have significant implications for within-  
36 host spread, genome reassortment and immune evasion.

37

38

39

40 **Author Summary:**

41 Influenza A viruses infect epithelial cells of the upper and lower respiratory tract in humans.  
42 Infection is propagated by the generation of viral particles from infected cells, which disseminate  
43 within the tissue. Disseminating particles can encounter obstacles in the extracellular  
44 environment, including mucus, ciliary movement, antibody neutralization and uptake by  
45 phagocytic immune cells. An alternative mode of spread, which avoids these hazards, involves  
46 direct transport of viral components between cells. This cell-cell spread of infection is not a well  
47 understood process. In this study we demonstrate that the host factor Rab11a mediates the  
48 transport of viral genomes in the cell-cell spread of infection. Rab11a is already known to play a  
49 pro-viral role in the transport of viral genomes to the plasma membrane for assembly into virus  
50 particles. Here, we see that this same transport mechanism is co-opted for direct cell-cell spread  
51 through cellular connections called tunneling nanotubes. We show that complexes of Rab11a  
52 and viral components can be trafficked across tunneling nanotubes, transmitting infection  
53 without the formation of virus particles. Importantly, this route of spread often seeds viral  
54 genomes from multiple donor cells into recipient cells, which in turn increases viral genetic  
55 diversity.

56

57 **Introduction:**

58 Influenza A virus (IAV) genomes are comprised of eight RNA segments that are packaged into the  
59 virion in the form of viral ribonucleoproteins (vRNPs), which contain viral nucleoprotein (NP) as  
60 well as the polymerase complex (PB2, PB1 and PA) (1). Influenza genome packaging mechanisms

61 have been studied extensively and, although there are a lot of unknowns, it has been  
62 demonstratively shown that the host cell protein Rab11a is crucial for the trafficking of newly  
63 synthesized vRNPs after they exit the nucleus to the site of assembly at the plasma membrane  
64 (2). Rab11a is a small GTPase that has multiple roles in the host cell, including a pivotal role in  
65 retrograde transport of cargo on recycling endosomes (3,4). The intracellular transport of vRNP-  
66 Rab11a complexes is thought to occur via the microtubule network with the help of dynein  
67 motors (5–8), and disruption of this network by nocodazole has been shown to attenuate the  
68 generation of viral progeny (5). Similarly, our work has shown that loss of Rab11a also leads to a  
69 reduction in viral titer, most likely due to a defect in the packaging of vRNPs, leading to the  
70 formation of incomplete viral particles (unpublished). Taken together, these data demonstrate  
71 the importance of an intact microtubule network as well as Rab11a in the influenza virus life  
72 cycle.

73 Tunneling nanotubes (TNTs) are F-Actin rich cellular connections that are formed between two  
74 or more cells (9). These connections can be formed over long distances and provide cytoplasmic  
75 connectivity between the cells, allowing for exchange of materials including organelles, nutrients,  
76 and membrane vesicles (10–12). Many viruses including HIV (13–15), herpesviruses (16) and  
77 influenza A viruses (17,18) have been shown to utilize these TNTs for cell-cell spread. Previous  
78 work by Roberts et al. and Kumar et al. has shown that influenza A virus spread via TNTs proceeds  
79 even in the presence of neutralizing antibodies or antivirals such as oseltamivir (17,18). This mode  
80 of infection does not depend on the formation of viral particles, thus allowing for the assembly  
81 stage of the lifecycle to be bypassed. Although the use of TNTs by IAVs has been shown, the exact  
82 mechanism is unclear.

83 In this study, we show that Rab11a mediates the transport of IAV vRNPs and proteins through  
84 TNTs, as evidenced by Rab11a co-localization with viral components in TNTs and the disruption  
85 of this transport with Rab11a knock out. This system was observed to be functional in multiple  
86 host cell backgrounds and virus strains. Using HA deficient viruses, we confirm that transport of  
87 viral components through TNTs can seed productive infection in recipient cells. In the context of  
88 viral co-infection, we find direct cell-cell spread often seeds viral genomes from multiple donor  
89 cells into recipient cells, thus promoting genome mixing and reassortment. Finally, our data  
90 suggests that, at least in the case of IAV infection, TNTs access the cytosol of both connected cells  
91 and allow bi-directional movement of cargo. Taken together, these findings demonstrate a novel  
92 and crucial role for Rab11a in the trafficking of IAV genomes via tunneling nanotubes and extend  
93 mechanistic understanding of this unconventional mode of viral dissemination.

#### 94 **Results:**

##### 95 ***IAV vRNPs associate with Rab11a within F-Actin rich TNTs.***

96 Upon nuclear exit, IAV vRNPs bind to Rab11a via PB2, allowing their transport to the plasma  
97 membrane for assembly. We hypothesized that vRNP-Rab11a complexes could also be routed to  
98 F-Actin rich intercellular connections called tunneling nanotubes (TNTs) and could seed new  
99 infections by direct transport through TNTs. To test this hypothesis, we visualized Rab11a, F-Actin  
100 and viral nucleoprotein (NP) - as a marker for vRNPs - in MDCK cells infected with either influenza  
101 A/Netherlands/602/2009 (NL09; pH1N1) or A/Panama/2007/99 (P99; H3N2) virus. NP and  
102 Rab11a were seen to co-localize in a perinuclear compartment, as has been shown previously  
103 (2,8). In addition, co-localization of these components was observed within the F-Actin rich TNTs

104 connecting infected and uninfected cells (Fig 1A). This observation suggests that there are at least  
105 two functional pathways for the trafficking of vRNP-Rab11a complexes post nuclear exit: the  
106 canonical assembly pathway and the TNT-mediated genome transfer pathway.

107 To further corroborate the role of Rab11a in the transport of vRNPs across TNTs, we utilized  
108 Rab11a knockout (KO) A549 cells generated by CRISPR/Cas9 and wild type (WT) A549 cells as a  
109 control. As before, cells were infected with either NL09 or P99 viruses and then stained for NP,  
110 Rab11a and F-Actin. WT cells showed co-localization of NP and Rab11a in the perinuclear region  
111 and within TNTs (Fig 1B and Supp Fig 1). Conversely, Rab11a KO cells did not show NP staining  
112 within the TNTs, indicating that Rab11a drives the transfer of vRNPs through TNTs (Fig 1C and  
113 Supp Fig 1).

114 ***Disruption of actin or loss of Rab11a significantly attenuates direct cell-cell transmission of***  
115 ***infection.***

116 Since we observed the presence of vRNP-Rab11a complexes within TNTs, we next tested whether  
117 the loss of either the TNTs or Rab11a influences the cell-cell spread of IAV infection. Previously,  
118 neutralizing antibodies or neuraminidase inhibitors have been used to block conventional viral  
119 infection and allow examination of IAV protein and RNA transport via TNTs (17,18). Although  
120 these methods are effective in abrogating conventional spread, we wanted to fully eliminate the  
121 generation of viral progeny to define the role of Rab11a and TNTs in IAV genome transfer more  
122 clearly. To this end, we rescued recombinant viruses in the NL09 and P99 strain backgrounds that  
123 lack the HA gene but instead contain either mVenus (NL09  $\Delta$ HA Venus; P99  $\Delta$ HA Venus) or  
124 mScarlet (NL09  $\Delta$ HA Scarlet) fluorescent reporter ORFs flanked by HA packaging signals. These

125 HA deficient reporter viruses are infection competent but are unable to produce progeny in the  
126 absence of a HA complementing cell line. Therefore, these viruses are excellent tools to study  
127 the cell-cell spread of IAV infection via TNTs.

128 To analyze the role of F-actin in the cell-cell spread of viral genomes, MDCK cells were infected  
129 with either NL09  $\Delta$ HA Venus or P99  $\Delta$ HA Venus viruses in the presence or absence of Cytochalasin  
130 D, which is a potent inhibitor of actin polymerization and disrupts TNTs (17,18). Cytochalasin D  
131 was added 2 h post internalization. HA positive cells were counted at 16, 24, and 48 h post-  
132 infection (p.i) and binned into one of two categories: single cells or foci comprising  $\geq 2$   
133 contiguous, positive cells. We hypothesized that the disruption of TNTs by Cytochalasin D would  
134 severely limit the spread of IAV genomes from infected cells, preventing the formation of infected  
135 foci. As shown in Figure 2, there was a significant reduction in the number of infected foci in the  
136 Cytochalasin D treated cells compared to the untreated controls in both the NL09  $\Delta$ HA Venus and  
137 P99  $\Delta$ HA Venus infected cells. These data confirm that intact TNTs are required for direct cell-cell  
138 spread of IAV genetic material.

139 Next, we analyzed the role of Rab11a in direct cell-cell spread of IAV. To do this, A549 WT and  
140 Rab11a KO cells were infected with either NL09  $\Delta$ HA Venus or P99  $\Delta$ HA Venus viruses. Venus  
141 positive cells were counted at 16, 24, and 48 h p.i. and categorized based on their presence as  
142 single cells or within foci at each time point. If Rab11a directs transport of vRNPs across TNTs,  
143 the loss of Rab11a would be expected to reduce the cell-cell spread of IAV genetic material. As  
144 shown Figure 3, this is indeed the case. In contrast to WT controls, the number of infected foci  
145 did not increase over time in the Rab11 KO cells. These data provide further evidence for the role  
146 of Rab11a in this alternate infection pathway.

147 ***Virion-independent genome transfer leads to productive infection by an actin-dependent***  
148 ***mechanism.***

149 To assess whether all eight genome segments can be transported via TNTs leading to the  
150 production of infectious progeny, we performed a co-culture experiment using MDCK cells and a  
151 MDCK-derived cell line which expresses the HA of influenza A/WSN/33 (H1N1) virus on the cell  
152 surface (MDCK WSN HA cells). When infected with an HA deficient reporter virus, these cells  
153 provide the HA protein required for the generation of infectious virus particles. For subsequent  
154 analysis of co-infection via TNT/Rab11a mediated genome transfer, these experiments were set  
155 up using two IAV strains, NL09  $\Delta$ HA Venus WT and NL09  $\Delta$ HA Scarlet VAR viruses. In addition to  
156 carrying differing reporter genes, these differ in the presence of a silent mutation in each  
157 segment of the VAR virus, which acts as a genetic tag (19). Neither of these differences is  
158 important for the purposes of the present analysis.

159 As outlined in Figure 4A, separate dishes of MDCK cells were singly infected with either NL09  $\Delta$ HA  
160 Venus WT or NL09  $\Delta$ HA Scarlet VAR virus, each at a MOI of 25 or 2.5 PFU/cell. After infection for  
161 2 hours, the cells were acid washed to remove residual inoculum and then trypsinized to make a  
162 cell slurry. MDCK cells infected with NL09  $\Delta$ HA Venus WT and NL09  $\Delta$ HA Scarlet VAR were mixed  
163 with naïve MDCK WSN HA cells in the ratio 1:1:2. The cell mixture was plated in medium  
164 containing trypsin (to allow activation of HA) and ammonium chloride (to prevent secondary  
165 infections mediated by virus particles). The cells were also treated with either vehicle or 30  $\mu$ M  
166 Cytochalasin D. If all eight segments of the viral genome can be transported across TNTs to a  
167 conducive cell, which in this case must be a MDCK WSN HA cell, then the recipient cell will  
168 produce virus particles. To detect any such progeny viruses produced, supernatant was collected



169 at 24, 48 and 72 h post mixing and plaque assays were performed on MDCK WSN HA cells. As can  
170 be seen from Figure 4B infectious virus was detected in the vehicle treated control cells, but not  
171 in the Cytochalasin D treated cells. Virus production in vehicle treated cells demonstrates the  
172 transfer of the full complement of IAV genome segments from infected cells which lack HA  
173 protein and cannot produce virions to cells which express complementing HA protein. A lack of  
174 virus production in Cytochalasin D treated cells indicates that this transfer was TNT-dependent.  
175 Comparing the two MOIs tested, a dose dependence was observed at 24 h, which is most likely  
176 due to the increased probability of an infected cell making a connection with a naïve MDCK WSN  
177 HA cell at higher MOI.

178 To analyze the effect of the loss of Rab11a on the production of infectious progeny, we co-  
179 cultured either A549 WT or A549 Rab11a KO cells infected with the NL09  $\Delta$ HA Venus WT or NL09  
180  $\Delta$ HA Scarlet VAR viruses with the MDCK WSN HA complementing line as described above.  
181 Supernatant was collected at 24, 48 and 72 h post mixing and plaque assays were performed on  
182 MDCK WSN HA cells. As can be seen from Figure 4C, infectious virus was detected from both  
183 A549 WT and Rab11a KO cells, with a marginal difference in titers. Since this observation was  
184 incongruent with our previous data demonstrating the importance of Rab11a in the transport of  
185 vRNPs, we hypothesized the transfer of viral genomes from the Rab11a KO cells was occurring  
186 via Rab11a that originates in the MDCK WSN HA cells. If correct, this observation would indicate  
187 that TNTs are open ended and allow for bi-directional movement of cargo.

188 ***TNTs allow bidirectional shuttling of Rab11a between cells***

189 To analyze if Rab11a could shuttle from one cell to another in a bi-directional manner, we used  
190 A549 cells stably expressing Rab11a fused to an mCherry fluorescent reporter in combination  
191 with A549 Rab11a KO cells. Briefly, A549 Rab11a KO cells were infected with NL09 WT virus at a  
192 MOI of 25. After 2 hours, the cells were acid washed to remove residual inoculum and then  
193 trypsinized to make a cell slurry. The infected cells were then mixed with uninfected A549  
194 mCherry Rab11a cells in a 1:1 ratio and plated onto coverslips, in the presence of vehicle or  
195 Cytochalasin D. At 24 h post mixing, cells were stained to visualize NP and F-Actin. As can be seen  
196 in Figure 5 and Supplementary Figure 2, in the absence of Cytochalasin D we observe co-  
197 localization of Rab11a and NP in the A549 Rab11 KO cells, indicating the transfer of mCherry  
198 Rab11a to the infected cells. The cells treated with Cytochalasin D do not show such co-  
199 localization, further demonstrating the crucial role of an intact F-Actin structure. These data thus  
200 show that the TNTs formed between cells in IAV infections are open ended and allow bi-  
201 directional movement.

### 202 ***TNTs serve as conduits for genome mixing and reassortment.***

203 Since we observed that infectious progeny could be generated via Rab11a-mediated genome  
204 transfer through TNTs, we hypothesized that this process could also mediate co-infection and  
205 therefore reassortment. In particular, reassortment would be expected if differentially infected  
206 donor cells connect to the same recipient cell. To test this hypothesis, the genotypes of virus  
207 produced from the co-cultures described in Figure 4B were evaluated. In these experiments, cells  
208 infected with NL09  $\Delta$ HA Venus WT virus were mixed with cells infected with NL09  $\Delta$ HA Scarlet  
209 VAR virus and these infected cells were in turn mixed with MDCK WSN HA cells; thus, co-  
210 infections could occur if WT infected and VAR infected cells each formed connections with the

211 same HA-expressing recipient cell and a full complement of IAV segments was reconstituted  
212 therein. The silent mutations differentiating each of the non-HA gene segments of the WT and  
213 VAR viruses allow the parental origin of segments to be identified. Thus, to evaluate  
214 reassortment, plaque clones were isolated from co-culture supernatants and the genotype of  
215 each was determined. The results show that viruses generated from MDCK WSN HA cells mixed  
216 with infected A549 WT cells were predominantly reassortant under all conditions evaluated  
217 (Figure 6A). In contrast, when MDCK WSN HA cells were mixed with infected A549 Rab11 KO  
218 cells, parental viruses typically dominated (Figure 6B). Thus, in a Rab11a-sufficient system,  
219 intercellular transfer of IAV vRNPs through TNTs readily yielded reassortants, indicating that TNTs  
220 are forming a network rather than pairwise connections between cells. When Rab11a was absent  
221 from infected donor cells, however, reassortants were rarely observed, suggesting that either  
222 fewer TNT connections are formed or vRNP transport through TNTs is less efficient.

223 We note that in both data sets shown in Figure 6, richness of viral genotypes was low, with at  
224 most four distinct gene constellations detected in each sample of 21 plaque isolates. This  
225 observation suggests that very few cells are producing most of the progeny virus in this  
226 experimental system, and that each producer cell is releasing virus with only one or a small  
227 number of genotypes. In turn, this suggests that MDCK WSN HA cells that receive a full  
228 complement of IAV vRNPs do not tend to receive multiple copies of a given segment. Although  
229 low in both culture systems, richness was significantly higher in the samples derived from A549  
230 WT cells compared to those from A549 Rab11a KO cells, with 2.8 and 1.9 unique genotypes  
231 detected on average, respectively ( $p=0.019$ , t-test). This difference is consistent with less efficient  
232 vRNP transfer when donor cells lack Rab11a.

233 **Discussion:**

234 Our data reveal a novel role for the host GTPase Rab11a in the trafficking of IAV genomes via  
235 tunneling nanotubes. We decisively show that productive infection can be mediated through this  
236 direct cell-to-cell route and find evidence that Rab11a can move through TNTs in a bidirectional  
237 manner to mediate IAV genome transfer. In the context of mixed infections, we furthermore find  
238 that TNT/Rab11a-mediated transfer readily leads to cellular coinfection and reassortment.

239 The trafficking of IAV genomes is a complex and poorly understood process. Although it is known  
240 that newly synthesized vRNPs form transient complexes with active Rab11a post nuclear exit and  
241 are trafficked to the plasma membrane for assembly on microtubule structures (5–8), the fate of  
242 these complexes is not completely elucidated. Here we examined the potential for Rab11a-vRNP  
243 complexes to be trafficked through TNTs to neighboring cells. Tunneling nanotubes (TNTs) are F-  
244 Actin based cytoplasmic connections that are utilized for long distance communication and have  
245 been shown to have a role in the IAV life cycle (17,18). TNTs can be used to transport vesicular  
246 cargo (10,20–22), so we posed the question of whether the Rab11a-vRNP vesicular complexes  
247 could be re-routed to these structures. We show that Rab11a and vRNPs co-localize within TNTs  
248 in multiple cell types. Loss of Rab11a leads to severely reduced detection of NP within the TNTs  
249 and dispersed NP localization within the cytoplasm. These observations strongly suggest that  
250 Rab11a-vRNP complexes are transported within TNTs.

251 TNTs are mainly composed of F-Actin and the transport of organelles through TNTs requires  
252 myosin motor activity on actin filaments (11,23–25). Since Rab11a can utilize both dynein motors,  
253 which drive microtubule movement (6,26,27), and myosin motors, which drive actin dynamics

254 (28–30), the observation that Rab11a mediates transport through TNTs raises the question of  
255 which motor proteins are involved. Studies to date on IAV infection have mainly focused on the  
256 role of Rab11a and microtubules. Further studies are needed to determine whether the same  
257 transport mechanism is active within TNTs and whether Rab11a-actin dynamics may function in  
258 vRNP transport both within and between cells.

259 The observation that infectious progeny could be recovered from co-cultures of infected Rab11a  
260 KO A549 cells with MDCK WSN HA cells, appeared to indicate that Rab11a is not required to  
261 mediate transport of vRNPs through TNTs. However, this observation made in the context of co-  
262 culture was reconciled with results from Rab11a KO A549 cell mono-culture by the visualization  
263 of mCherry Rab11a within infected Rab11a KO cells. TNTs can be formed in multiple ways - single  
264 ended, open ended or closed - and therefore support varying modes of transport (9,12,31). Our  
265 experiments were dependent on an HA-encoding producer cell that expresses functional Rab11a.  
266 As a result, the generation of progeny virions in the Rab11a KO co-culture is likely due to the  
267 formation of open ended, bi-directional TNTs that allow Rab11a from the producer cell to shuttle  
268 to and from infected KO cells where it could pick up vRNPs. This process seems to be inefficient,  
269 however, as evidenced by the low rate of reassortment observed when infected cells do not  
270 encode Rab11a. The possibility of bidirectional trafficking of vRNPs between cells opens hitherto  
271 unexplored avenues of viral infection.

272 Our data revealing that coinfection and reassortment can occur through TNT transfer of vRNPs  
273 between cells raise new questions about the processes driving IAV genetic exchange. The  
274 prevalence of reassortants produced via TNT transfer from Rab11a+ cells indicates that vRNPs  
275 may be trafficked individually or as subgroups and not as a constellation of 8 segments. This

276 process would then seed incomplete viral genomes into recipient cells, which require  
277 complementation to allow the production of progeny viruses. Owing to this reliance on  
278 complementation, incomplete viral genomes are known to augment reassortment (32–34). Our  
279 data suggest that both seeding and complementation of incomplete viral genomes can occur via  
280 TNT transfer of vRNPs. In the presence of a conventional viral infection system, co-infection with  
281 multiple virions is thought to be the *modus operandi* of IAV reassortment, where reassortment  
282 efficiency is a function of the dose and relative timing of two infections, as well as levels of  
283 incomplete viral genomes (19,32). It will be interesting to determine whether TNT-mediated co-  
284 infection is also sensitive to dose and timing. More broadly, further work is needed to tease out  
285 the extent to which TNT mediated reassortment occurs alongside conventional modes of  
286 reassortment.

287 IAV spread through TNTs may be particularly important in the evasion of antibodies, and other  
288 antiviral factors that act directly on extracellular virions, in a manner that does not depend on  
289 the generation of escape mutants. Direct cell-cell spread may also make an important  
290 contribution to spatial structure within the infected host, leading to more localized spread and  
291 limiting mixing among *de novo* variants (35). To further investigate these potential implications,  
292 an exciting prospect for future work is the development of *ex vivo* and *in vivo* models for the  
293 study and visualization of TNT mediated cell-cell spread.

294 In summary, our data show a novel role for Rab11a in the IAV life cycle, where it can mediate  
295 vesicular transport of vRNPs across TNTs and seed new infections (Figure 7). Future work to  
296 elucidate the exact mechanism of transport of the Rab11a-vRNP complexes, including the motors

297 utilized and the fate of the incoming Rab11a-vRNP complexes in the recipient cytosol, are exciting  
298 avenues to be studied and will further our understanding of IAV-host interactions.

## 299 **Materials and Methods:**

### 300 *Cells and cell culture media*

301 MDCK cells (obtained from Dr. Daniel Perez) and MDCK WSN HA cells (obtained from Dr. Ryan  
302 Langlois) were maintained Minimal Essential Medium (Sigma) supplemented with 10% fetal  
303 bovine serum (FBS; Atlanta Biologicals), penicillin (100 IU ml<sup>-1</sup>), and streptomycin (100 µg ml<sup>-1</sup>;  
304 PS; Corning). A549 WT, A549 Rab11a KO and A549 mCherry Rab11a (6) (obtained from Dr. Seema  
305 Lakdawala) were maintained in Dulbecco's Modified Essential Medium (Gibco) supplemented  
306 with 10% FBS (Atlanta Biologicals), and PS. All cells were cultured at 37 °C and 5% CO<sub>2</sub> in a  
307 humidified incubator. All cell lines were tested monthly for mycoplasma contamination while in  
308 use. The medium for culture of IAV in each cell line (termed virus medium) was prepared by  
309 eliminating FBS and supplementing the appropriate medium with 4.3% BSA and PS. Ammonium  
310 chloride-containing virus medium was prepared by the addition of HEPES buffer and NH<sub>4</sub>Cl at  
311 final concentrations of 50 mM and 20 mM, respectively. OPTi-MEM (Gibco) was used as a serum  
312 free medium where indicated.

### 313 *Generation of CRISPR KO Cells*

314 Rab11a KO A549 cells were generated using two guide RNAs (gRNA) targeting the promoter and  
315 exon 1 of the Rab11a gene as previously described (36). Oligonucleotides for the CRISPR target  
316 sites T1 (forward CACCGCATTTTCGAGTAAATCGAGAC and reverse  
317 AAACGTCTCGATTTACTCGAAATGC) and T2 (forward CACCGTAACATCAGCGTAAGTCTCA and

318 reverse AACTGAGACTTACGCTGATGTTAC) were annealed and cloned into lentiCRISPRv2  
319 (Addgene #52961) and LRG (Addgene #65656) expression vectors, respectively. A549 cells  
320 transduced with lentivirus vectors expressing gRNAs were selected in the presence of 2 µg/mL  
321 puromycin for 10 days and clonal Rab11a KO cells were generated by limiting dilution of the  
322 polyclonal population. Rab11a KO cells were identified by PCR analysis of the targeted genomic  
323 region using the following primers (forward TGTTC AACCCCTACCCCATTC and reverse  
324 TGAAGCAAACACCAGGAAGAACTC) and further confirmed by western blot analysis of Rab11a  
325 expression (36).

### 326 *Viruses*

327 All viruses used in this study were generated by reverse genetics (37). For influenza  
328 A/Panama/2007/99 virus (P99; H3N2), 293T cells transfected with reverse-genetics plasmids 16–  
329 24 h previously were injected into the allantoic cavity of 9- to 11-d-old embryonated chicken eggs  
330 and incubated at 37 °C for 40–48 h. The resultant egg passage 1 stocks were used in experiments.  
331 For influenza A/Netherlands/602/2009 virus (NL09; pH1N1), 293T cells transfected with reverse-  
332 genetics plasmids 16–24 h previously were co-cultured with MDCK cells at 37 °C for 40–48 h. The  
333 supernatants were then propagated in MDCK cells at a low MOI to generate NL09 working stocks.  
334 The titers for these viruses were obtained by plaque assays on MDCK cells.

335 The NL09 ΔHA Venus WT, P99 ΔHA Venus WT and NL09 ΔHA Scarlet VAR viruses were generated  
336 by reverse genetics by co-culture with MDCK WSN HA cells rather than MDCK cells. The ΔHA  
337 Venus and ΔHA Scarlet rescue plasmids were prepared by inserting either the mVenus (38) or  
338 mScarlet (39) ORF within the HA sequence, retaining only the 3' terminal 136 nucleotides of the



339 HA segment upstream of the reporter gene start codon and the 5' terminal 136 nucleotides of  
340 the HA segment downstream of the reporter gene stop codon. ATG sequences within the  
341 upstream portion were mutated to ATT to prevent premature translation start (40). As previously  
342 described (41), one silent mutation was introduced into each NL09 cDNA to generate the NL09  
343 VAR reverse genetics system, which was used to generate the NL09  $\Delta$ HA Scarlet VAR virus. These  
344 silent mutations enable differentiation of VAR virus segments from those of the WT virus using  
345 high-resolution melt analysis (19,42).

#### 346 *Immunofluorescence and Imaging*

347 For fixed cell imaging, MDCK, A549 WT or A549 Rab11a KO cells were seeded onto glass  
348 coverslips. Infection with either NL09 or P99 viruses was performed the next day by adding 250  
349  $\mu$ l of inoculum to the coverslips and incubating at 37°C for 1 h with intermittent rocking. Inoculum  
350 was removed, cells washed twice with 1X PBS and Opti-MEM added to the dish. After incubation  
351 at 37°C for 24 h, cells were washed with 1X PBS (Corning) thrice and fixed with 4%  
352 paraformaldehyde (AlfaAesar) for 15 minutes at room temperature. Cells were washed with 1X  
353 PBS and permeabilized using 1% Triton X-100 (Sigma) in PBS for 5 minutes at room temperature  
354 and washed with 1X PBS. Cells were stained with mouse anti NP antibody (Abcam ab43821)  
355 (1:100), rabbit anti Rab11a antibody (Sigma HPA051697) (1:100), and Phalloidin Alexa Fluor 647  
356 (Invitrogen A22287) (1:40) overnight at 4°C. Cells were washed thrice with 1X PBS and incubated  
357 with donkey anti mouse Alexa Fluor 555 (Invitrogen A32773) (1:1000) and Anti rabbit Alexa Fluor  
358 488 (Invitrogen A32731) (1:1000) for 1 h at 37°C.

359 For the A549 Rab11a KO plus A549 mCherry Rab11a co-cultures, seeding, infection, fixation and  
360 permeabilization were performed as above. Cells were stained with mouse anti NP antibody  
361 (Abcam ab43821) (1:100), and Phalloidin Alexa Fluor 647 (Invitrogen A22287) (1:40) overnight at  
362 4°C. Cells were washed thrice with 1X PBS and incubated with donkey anti mouse Alexa Fluor 488  
363 (Invitrogen A21202) (1:1000) for 1 h at 37°C. Cells were washed thrice with 1X PBS and once with  
364 ultra-pure water (Gibco) before mounting on glass slides using ProLong Diamond Antifade  
365 mountant containing DAPI (Invitrogen P36962). Confocal images were collected using the  
366 Olympus FV1000 Inverted Microscope at 60X 1.49 NA Oil magnification on a Prior motorized  
367 stage. Images were acquired with a Hamamatsu Flash 4.0 sCMOS camera controlled with  
368 Olympus Fluoview v4.2 software. All images were processed using Fiji image analysis software  
369 (43).

#### 370 *Quantification of cell-cell transmission*

371 MDCK, A549 WT and A549 KO cells were inoculated with NL09  $\Delta$ HA Venus WT or P99  $\Delta$ HA Venus  
372 WT virus at a MOI of 0.5 PFU/cell and incubated for 1 h at 37°C. Cells were washed with 1X PBS  
373 (Corning) to remove residual inoculum and supplemented with OPTI-MEM (Gibco) without  
374 trypsin and in the presence of 30  $\mu$ M Cytochalasin D (Sigma) where indicated and incubated at  
375 37°C. Infected cells were counted by the presence of green fluorescence using an epifluorescence  
376 microscope (Zeiss) at the time points indicated and binned into single infected or foci of infected  
377 cells. Foci were defined as clusters of at least two contiguous, positive, cells. The cell counts were  
378 graphed using the GraphPad Prism software (44).

#### 379 *Co-culture for production of infectious virus*

380 MDCK, A549 WT or A549 Rab11a KO cells were inoculated with either NL09  $\Delta$ HA Venus WT or  
381 NL09  $\Delta$ HA Venus VAR at a MOI of 25 PFU/cell or 2.5 PFU/cell and were incubated in virus medium  
382 without trypsin for 2 h at 37 °C. Cells were washed twice with 1X PBS (Corning) and then treated  
383 with PBS-HCl, pH 3.0 for 5 min at room temperature to remove residual inoculum. Cells were  
384 washed once with 1X PBS and then trypsinized using 0.5 M trypsin-EDTA (Corning). Cell slurry  
385 was collected in growth medium containing FBS and centrifuged at 1000 rpm or 5 minutes in a  
386 tabletop centrifuge (Thermo Sorvall ST16) to pellet cells. Supernatant was aspirated and cells  
387 resuspended in virus medium containing TPCK-trypsin (Sigma), 20 mM HEPES (Corning) and 50  
388 mM NH<sub>4</sub>Cl (Sigma) with or without 30  $\mu$ M Cytochalasin D (Sigma) as indicated. Infected cell slurry  
389 was mixed with naïve MDCK WSN HA cells in a ratio of 1:1:2 of NL09  $\Delta$ HA Venus WT: NL09  $\Delta$ HA  
390 Scarlet VAR: Naïve MDCK WSN HA cells respectively and plated onto 6-well plates. Cells were  
391 allowed to attach at 37 °C and supernatant was collected at indicated time points for analysis.

#### 392 *Quantification of reassortment*

393 Reassortment was quantified for coinfection supernatants as described previously (19). Briefly,  
394 plaque assays were performed on MDCK WSN HA cells in 10 cm dishes to isolate virus clones.  
395 Serological pipettes (1 ml) were used to collect agar plugs into 160  $\mu$ l PBS. Using a ZR-96 viral RNA  
396 kit (Zymo), RNA was extracted from the agar plugs and eluted in 40  $\mu$ l nuclease-free water  
397 (Invitrogen). Reverse transcription was performed using Maxima reverse transcriptase (RT;  
398 Thermofisher) according to the manufacturer's protocol. The resulting cDNA was diluted 1:4 in  
399 nuclease-free water, each cDNA was combined with segment-specific primers (Supplementary  
400 Table 1) and Precision melt supermix (Bio-Rad) and analysed by qPCR using a CFX384 Touch real-  
401 time PCR detection system (Bio-Rad) designed to amplify a region of approximately 100 bp from

402 each gene segment that contains a single nucleotide change in the VAR virus. The qPCR was  
403 followed by high-resolution melt analysis to differentiate the WT and VAR amplicons (19).  
404 Precision Melt Analysis software (Bio-Rad) was used to determine the parental virus origin of  
405 each gene segment based on the melting properties of the cDNA fragments and comparison to  
406 WT and VAR controls. Each plaque was assigned a genotype based on the combination of WT and  
407 VAR genome segments, with two variants on each of seven segments allowing for 128 potential  
408 genotypes.

409

#### 410 **Acknowledgements:**

411 We thank Drs. Seema Lakdawala and Ryan Langlois for generous sharing of cell lines. This  
412 research project was supported in part by the Emory University Integrated Cellular Imaging  
413 Microscopy Core and was funded by NIH/NIAID Centers of Excellence in Influenza Research and  
414 Surveillance (CEIRS), contract number HHSN272201400004C and NIH R01AI127799. Julianna Han  
415 was partly supported by the NIH Molecular and Cellular Biology training program at The  
416 University of Chicago (T32GM007183); Julianna Han was partly supported the NIH Diversity  
417 Supplement (R01AI123359- 02S1). Dr. Balaji Manicassamy is supported by NIAID grants  
418 (R01AI123359 and R01AI127775).

#### 419 **References:**

- 420 1. Noda T. Selective Genome Packaging Mechanisms of Influenza A Viruses. Cold Spring  
421 Harb Perspect Med. 2020;

- 422 2. Eisfeld AJ, Kawakami E, Watanabe T, Neumann G, Kawaoka Y. RAB11A Is Essential for  
423 Transport of the Influenza Virus Genome to the Plasma Membrane. *J Virol.* 2011;
- 424 3. Weisz OA, Rodriguez-Boulan E. Apical trafficking in epithelial cells: Signals, clusters and  
425 motors. *Journal of Cell Science.* 2009.
- 426 4. Chen W, Feng Y, Chen D, Wandinger-Ness A. Rab11 is required for trans-Golgi network-  
427 to-plasma membrane transport and a preferential target for GDP dissociation inhibitor.  
428 *Mol Biol Cell.* 1998;
- 429 5. Nturibi E, Bhagwat AR, Coburn S, Myerburg MM, Lakdawala SS. Intracellular  
430 Colocalization of Influenza Viral RNA and Rab11A Is Dependent upon Microtubule  
431 Filaments. *J Virol.* 2017;
- 432 6. Bhagwat AR, Le Sage V, Nturibi E, Kulej K, Jones J, Guo M, et al. Quantitative live cell  
433 imaging reveals influenza virus manipulation of Rab11A transport through reduced  
434 dynein association. *Nat Commun.* 2020;
- 435 7. Amorim MJ, Bruce EA, Read EKC, Foeglein A, Mahen R, Stuart AD, et al. A Rab11- and  
436 Microtubule-Dependent Mechanism for Cytoplasmic Transport of Influenza A Virus Viral  
437 RNA. *J Virol.* 2011;
- 438 8. Bruce EA, Digard P, Stuart AD. The Rab11 Pathway Is Required for Influenza A Virus  
439 Budding and Filament Formation. *J Virol.* 2010;
- 440 9. Austefjord MW, Gerdes HH, Wang X. Tunneling nanotubes: Diversity in morphology and  
441 structure. *Commun Integr Biol.* 2014;

- 442 10. Gerdes HH, Carvalho RN. Intercellular transfer mediated by tunneling nanotubes. *Current*  
443 *Opinion in Cell Biology*. 2008.
- 444 11. Abounit S, Zurzolo C. Wiring through tunneling nanotubes - from electrical signals to  
445 organelle transfer. *J Cell Sci*. 2012;
- 446 12. Marzo L, Gousset K, Zurzolo C. Multifaceted roles of tunneling nanotubes in intercellular  
447 communication. *Frontiers in Physiology*. 2012.
- 448 13. Hashimoto M, Bhuyan F, Hiyoshi M, Noyori O, Nasser H, Miyazaki M, et al. Potential Role  
449 of the Formation of Tunneling Nanotubes in HIV-1 Spread in Macrophages. *J Immunol*.  
450 2016;
- 451 14. Bracq L, Xie M, Benichou S, Bouchet J. Mechanisms for cell-to-cell transmission of HIV-1.  
452 *Frontiers in Immunology*. 2018.
- 453 15. Eugenin E a, Gaskill PJ, Berman JW. A potential mechanism for intercellular HIV  
454 trafficking. *Commun Integr Biol*. 2009;
- 455 16. Panasiuk M, Rychłowski M, Derewońko N, Bieńkowska-Szewczyk K. Tunneling Nanotubes  
456 as a Novel Route of Cell-to-Cell Spread of Herpesviruses. *J Virol*. 2018;
- 457 17. Kumar A, Kim JH, Ranjan P, Metcalfe MG, Cao W, Mishina M, et al. Influenza virus  
458 exploits tunneling nanotubes for cell-to-cell spread. *Sci Rep*. 2017;
- 459 18. Roberts KL, Manicassamy B, Lamb RA. Influenza A Virus Uses Intercellular Connections To  
460 Spread to Neighboring Cells. *J Virol*. 2015;
- 461 19. Marshall N, Priyamvada L, Ende Z, Steel J, Lowen AC. Influenza Virus Reassortment

- 462 Occurs with High Frequency in the Absence of Segment Mismatch. *PLoS Pathog.* 2013;
- 463 20. Jansens RJJ, Tishchenko A, Favoreel HW. Bridging the Gap: Virus Long-Distance Spread  
464 via Tunneling Nanotubes. *J Virol.* 2020;
- 465 21. Kimura S, Hase K, Ohno H. Tunneling nanotubes: Emerging view of their molecular  
466 components and formation mechanisms. *Exp Cell Res.* 2012;
- 467 22. Zhu S, Bhat S, Syan S, Kuchitsu Y, Fukuda M, Zurzolo C. Rab11a-Rab8a cascade regulates  
468 the formation of tunneling nanotubes through vesicle recycling. *J Cell Sci.* 2018;
- 469 23. Gousset K, Marzo L, Commere PH, Zurzolo C. Myo10 is a key regulator of TNT formation  
470 in neuronal cells. *J Cell Sci.* 2013;
- 471 24. Sartori-Rupp A, Cordero Cervantes D, Pepe A, Gousset K, Delage E, Corroyer-Dulmont S,  
472 et al. Correlative cryo-electron microscopy reveals the structure of TNTs in neuronal  
473 cells. *Nat Commun.* 2019;
- 474 25. Delage E, Cervantes DC, Pénard E, Schmitt C, Syan S, Disanza A, et al. Differential identity  
475 of Filopodia and Tunneling Nanotubes revealed by the opposite functions of actin  
476 regulatory complexes. *Sci Rep.* 2016;
- 477 26. Horgan CP, Hanscom SR, Jolly RS, Futter CE, McCaffrey MW. Rab11-FIP3 links the Rab11  
478 GTPase and cytoplasmic dynein to mediate transport to the endosomal-recycling  
479 compartment. *J Cell Sci.* 2010;
- 480 27. Horgan CP, Hanscom SR, Jolly RS, Futter CE, McCaffrey MW. Rab11-FIP3 binds dynein  
481 light intermediate chain 2 and its overexpression fragments the Golgi complex. *Biochem*

- 482 Biophys Res Commun. 2010;
- 483 28. Hales CM, Vaerman JP, Goldenring JR. Rab11 family interacting protein 2 associates with  
484 myosin Vb and regulates plasma membrane recycling. J Biol Chem. 2002;
- 485 29. Schafer JC, Baetz NW, Lapierre LA, Mcrae RE, Roland JT, Goldenring JR. Rab11-FIP2  
486 interaction with myo5b regulates movement of rab11a-containing recycling vesicles.  
487 Traffic. 2014;
- 488 30. Lapierre LA, Kumar R, Hales CM, Navarre J, Bhartur SG, Burnette JO, et al. Myosin Vb is  
489 associated with plasma membrane recycling systems. Mol Biol Cell. 2001;
- 490 31. Kimura S, Hase K, Ohno H. The molecular basis of induction and formation of tunneling  
491 nanotubes. Cell and Tissue Research. 2013.
- 492 32. Fonville JM, Marshall N, Tao H, Steel J, Lowen AC. Influenza Virus Reassortment Is  
493 Enhanced by Semi-infectious Particles but Can Be Suppressed by Defective Interfering  
494 Particles. PLoS Pathog. 2015;
- 495 33. Jacobs NT, Onuoha NO, Antia A, Steel J, Antia R, Lowen AC. Incomplete influenza A virus  
496 genomes occur frequently but are readily complemented during localized viral spread.  
497 Nat Commun. 2019;
- 498 34. Phipps KL, Ganti K, Jacobs NT, Lee CY, Carnaccini S, White MC, et al. Collective  
499 interactions augment influenza A virus replication in a host-dependent manner. Nat  
500 Microbiol. 2020;
- 501 35. Gallagher ME, Brooke CB, Ke R, Koelle K. Causes and consequences of spatial within-host



- 502 viral spread. *Viruses*. 2018.
- 503 36. Han J, Perez JT, Chen C, Andrade J, Manicassamy B, Han J, et al. Genome-wide CRISPR /  
504 Cas9 Screen Identifies Host Factors Essential for Influenza Virus Replication. *Cell Rep*.  
505 2018;23(2):596–607.
- 506 37. Neumann G, Watanabe T, Ito H, Watanabe S, Goto H, Gao P, et al. Generation of  
507 influenza A viruses entirely from cloned cDNAs. *Proc Natl Acad Sci U S A*. 1999;
- 508 38. Cox RS, Dunlop MJ, Elowitz MB. A synthetic three-color scaffold for monitoring genetic  
509 regulation and noise. *J Biol Eng*. 2010;
- 510 39. Bindels DS, Haarbosch L, Van Weeren L, Postma M, Wiese KE, Mastop M, et al. MScarlet:  
511 A bright monomeric red fluorescent protein for cellular imaging. *Nat Methods*. 2016;
- 512 40. White MC, Steel J, Lowen AC. Heterologous Packaging Signals on Segment 4, but Not  
513 Segment 6 or Segment 8, Limit Influenza A Virus Reassortment. *J Virol*. 2017;
- 514 41. Phipps KL, Marshall N, Tao H, Danzy S, Onuoha N, Steel J, et al. Seasonal H3N2 and 2009  
515 Pandemic H1N1 Influenza A Viruses Reassort Efficiently but Produce Attenuated Progeny.  
516 *J Virol*. 2017;
- 517 42. Wittwer CT, Reed GH, Gundry CN, Vandersteen JG, Pryor RJ. High-resolution genotyping  
518 by amplicon melting analysis using LCGreen. *Clin Chem*. 2003;
- 519 43. Schindelin J, Arganda-Carreras I, Frise E, Kaynig V, Longair M, Pietzsch T, et al. Fiji: An  
520 open-source platform for biological-image analysis. *Nature Methods*. 2012.
- 521 44. Motulsky H. *Analyzing Data with GraphPad Prism*. PRism. 1999.

522

523 **Figure Legends:**

524 **Figure 1. IAV vRNPs associate with Rab11a within F-Actin rich TNTs.**

525 (A) MDCK cells, (B) A549 WT and (C) A549 Rab11a KO cells were mock-infected or infected with  
526 NL09 or P99 viruses. Cells were stained for DAPI (blue), NP (red), Rab11a (green) and F-Actin  
527 (pink). Representative images are shown with additional images in Supplementary Figure 1 (S1  
528 A,B and C).

529 **Figure 2. Disruption of actin abrogates direct cell-cell transmission of infection.**

530 MDCK cells infected with NL09  $\Delta$ HA Venus WT (A) or P99  $\Delta$ HA Venus WT (B) were counted as  
531 single infected cells or foci of infected cells. Significance of differences in the number of infected  
532 foci between the control and Cytochalasin D treated groups was tested using 2-way ANOVA with  
533 Bonferroni's correction for multiple comparisons (\*\*\*\* P-value <0.0001). Error bars represent  
534 the standard error of three replicates within one representative experiment.

535 **Figure 3. Loss of Rab11a abrogates direct cell-cell transmission of infection.**

536 A549 WT or A549 Rab11a KO cells infected with NL09  $\Delta$ HA Venus WT (A) or P99  $\Delta$ HA Venus WT  
537 (B) were counted as single infected cells or foci of infected cells. Significance of differences in the  
538 number of infected foci between cell types was tested using 2-way ANOVA with Bonferroni's  
539 correction for multiple comparisons (\*\*\*\* P-value <0.0001). Error bars represent the standard  
540 error of three replicates within one representative experiment.

541 **Figure 4. Virion-independent genome transfer leads to productive infection by an actin-**  
542 **dependent mechanism.**

543 (A) Experimental workflow for MDCK, A549 WT or A549 Rab11a KO infection and co-culture with  
544 MDCK WSN HA cells (generated via BioRender.com). Plotted is the infectious virus yield from co-  
545 culture of MDCK WSN HA cells with (B) MDCK cells and (C) A549 WT cells or A549 Rab11a KO cells  
546 infected with NL09  $\Delta$ HA Venus WT and NL09  $\Delta$ HA Scarlet VAR viruses. Significance of differences  
547 between the control and Cytochalasin D treated cells or the WT and KO cells was tested using 2-  
548 way ANOVA with Bonferroni's correction for multiple comparisons (\*\* P-value <0.01; \*\*\* P-value  
549 <0.001; ns=not significant). Error bars represent the standard error of three replicate infections  
550 (black circles). The dotted line represents the limit of detection of the plaque assay.

551 **Figure 5. TNTs allow for bidirectional shuttling of Rab11a between cells.**

552 A549 Rab11a KO cells infected with NL09 WT virus and co-cultured with uninfected A549  
553 mCherry Rab11a cells (red), with or without Cytochalasin D. Cells stained for DAPI (blue), NP  
554 (green) and F-Actin (grey). Representative images are shown with additional images in  
555 Supplementary Figure 2 (S2).

556 **Figure 6. TNTs serve as conduits for genome mixing and reassortment in a Rab11a dependent**  
557 **manner.**

558 Genotypes of clonal viral isolates collected from the culture medium of NL09  $\Delta$ HA Venus WT and  
559 NL09  $\Delta$ HA Scarlet VAR virus infected A549 WT cells (left panels) or A549 Rab11a KO cells (right  
560 panels) co-cultured with MDCK WSN HA cells. Three replicate co-cultures per condition were  
561 sampled serially at the time points indicated and 21 plaque isolates were analyzed per sample.

562 The origin of the gene segments, represented by the columns in each table, is denoted by the  
563 colored boxes (blue = WT and red = VAR). The segments are in order PB2, PB1, PA, NP, NA, M and  
564 NS moving from left to right. The white panels indicate samples where no plaques were detected  
565 (ND = not detected).

566 **Figure 7. Working model for Rab11a mediated vRNP transport across TNTs.**

567 vRNP complexes synthesized within the nucleus are exported out and form Rab11a-vRNP  
568 complexes. Two potential fates of these complexes are shown - the classical assembly and egress  
569 pathway for production of progeny virions and transport of these complexes via TNTs to an  
570 uninfected cell. A new infection is initiated in the recipient cell, resulting in progeny virion  
571 production. Generated via BioRender.com.

Fig 1

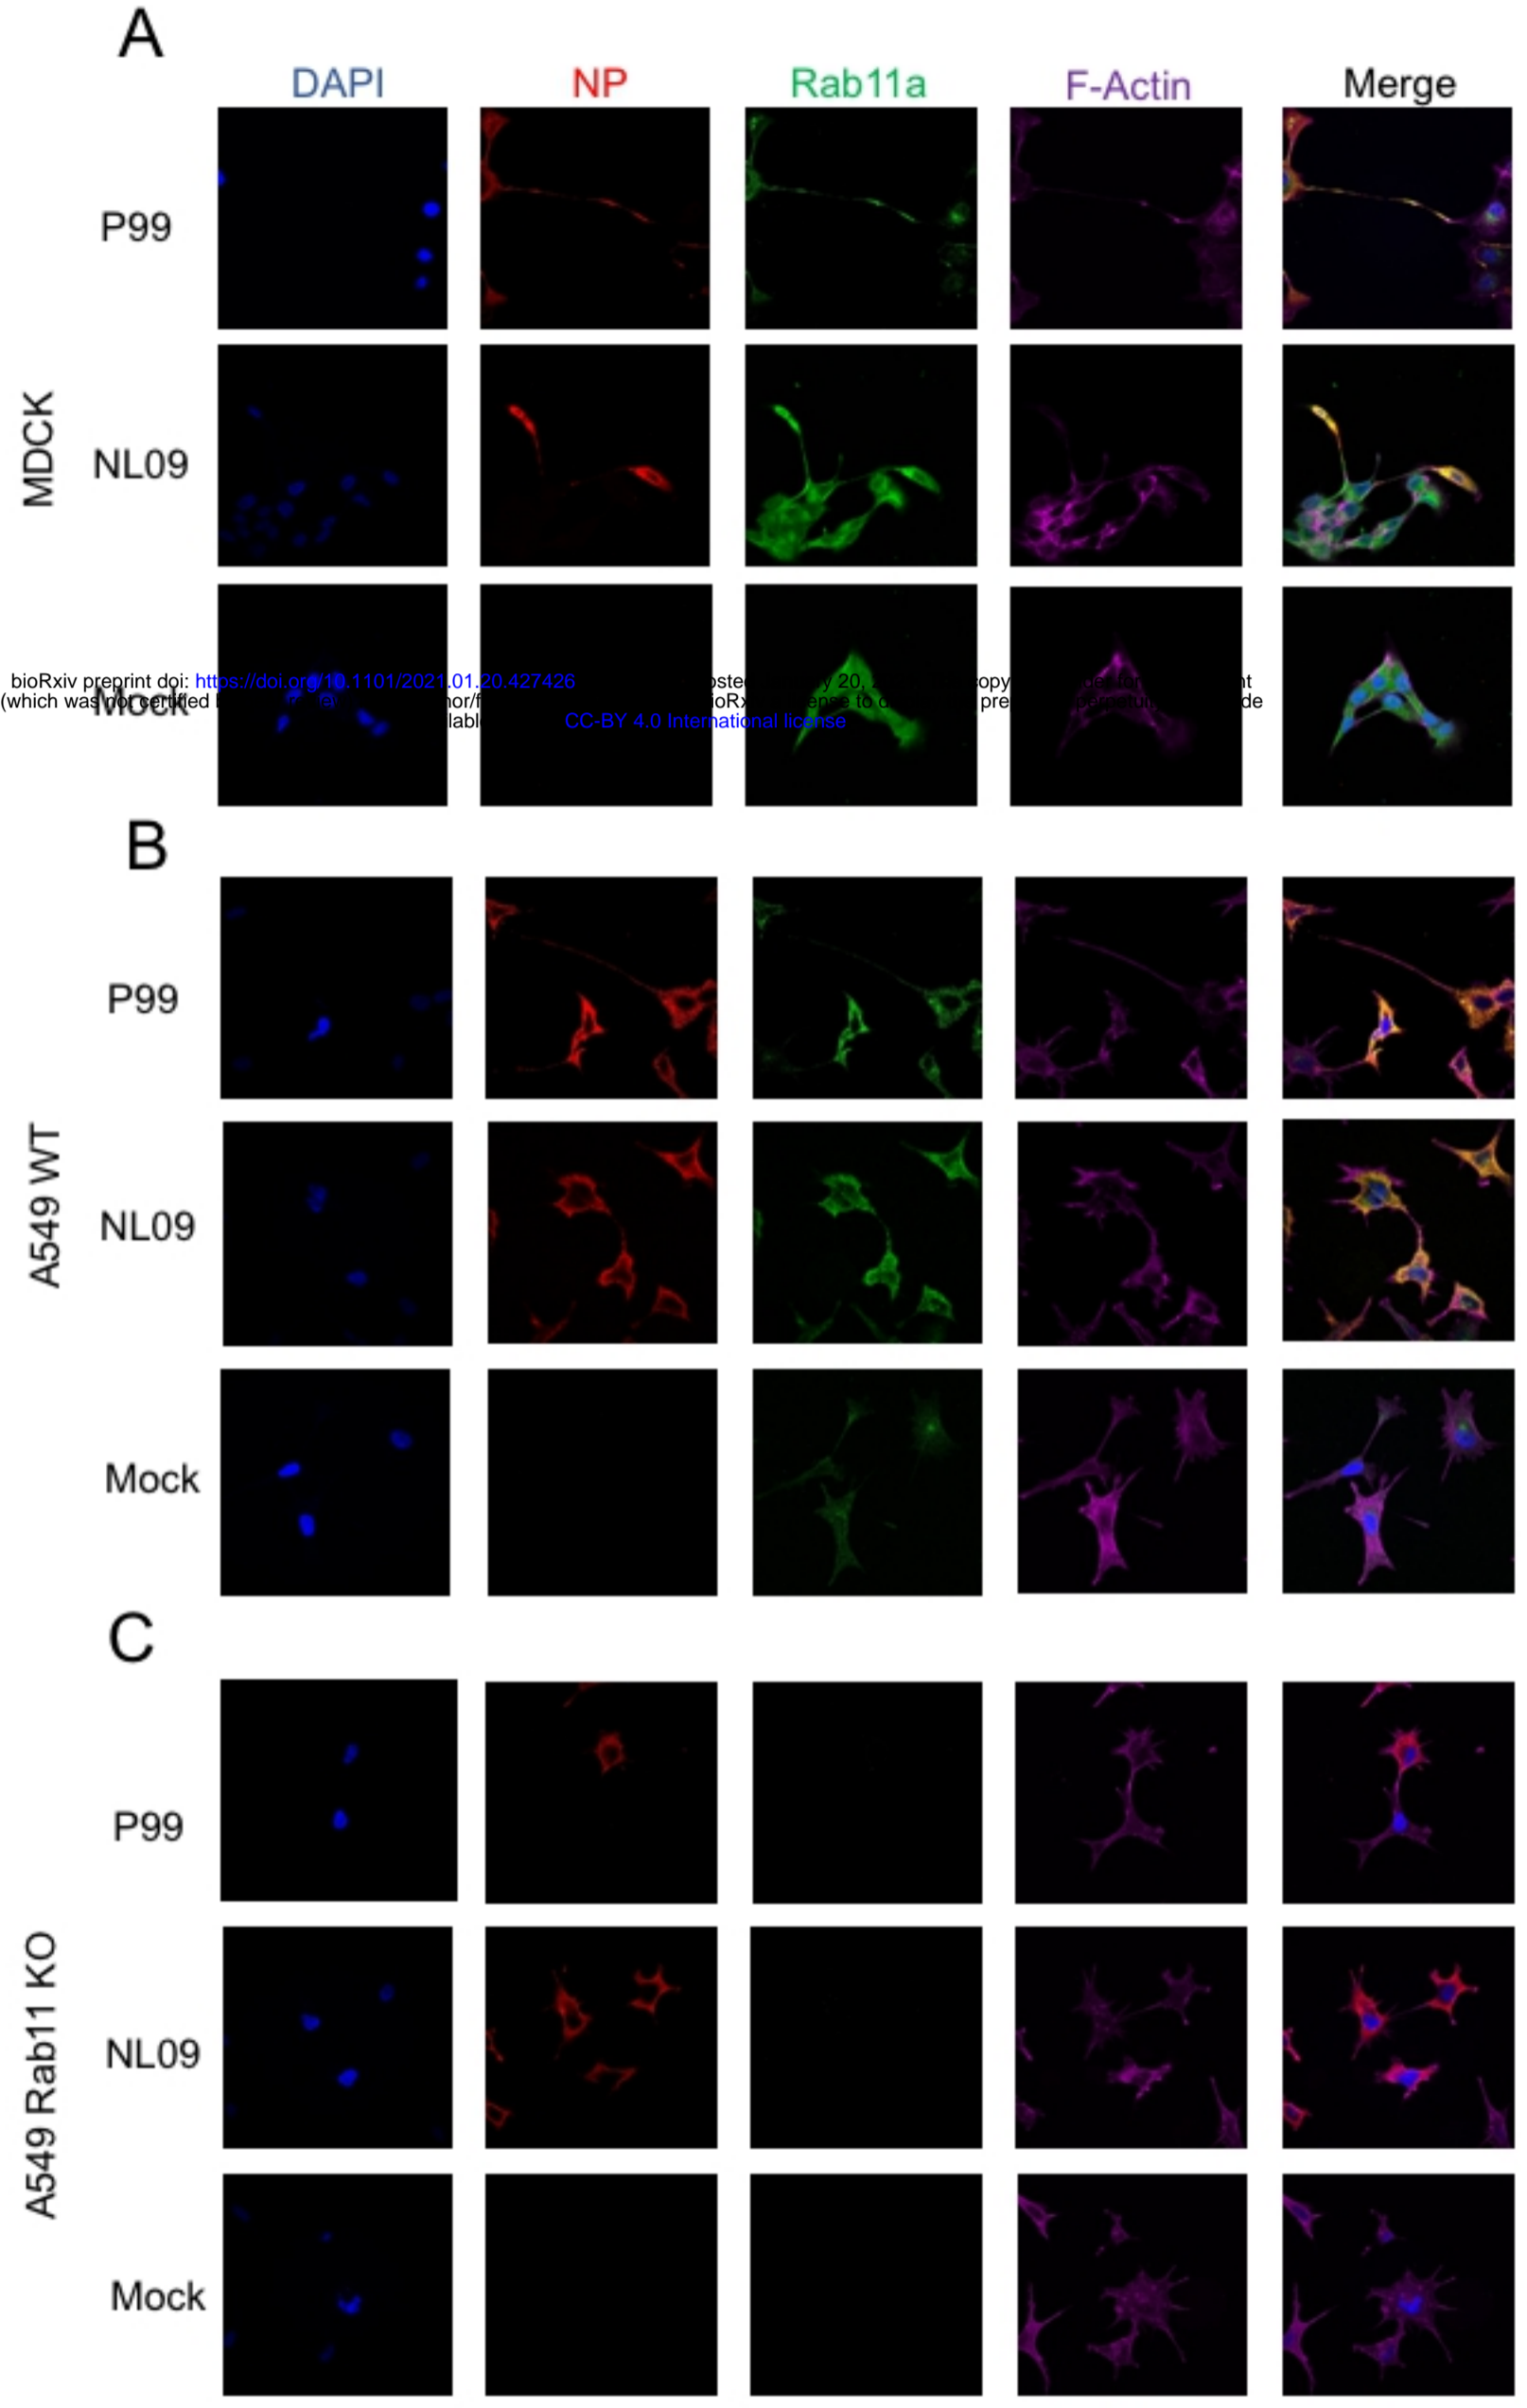

Figure 1

Fig 2

A

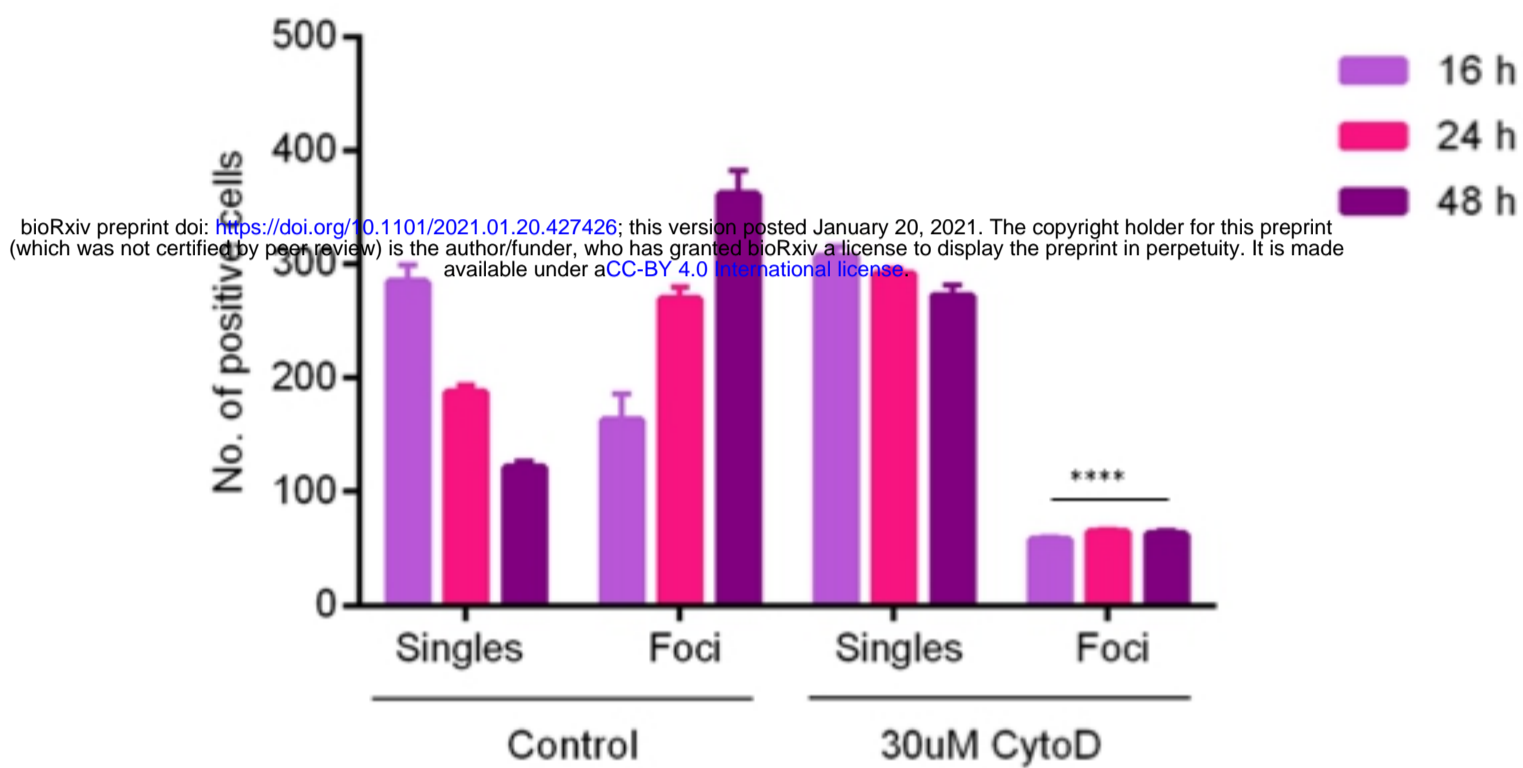

B

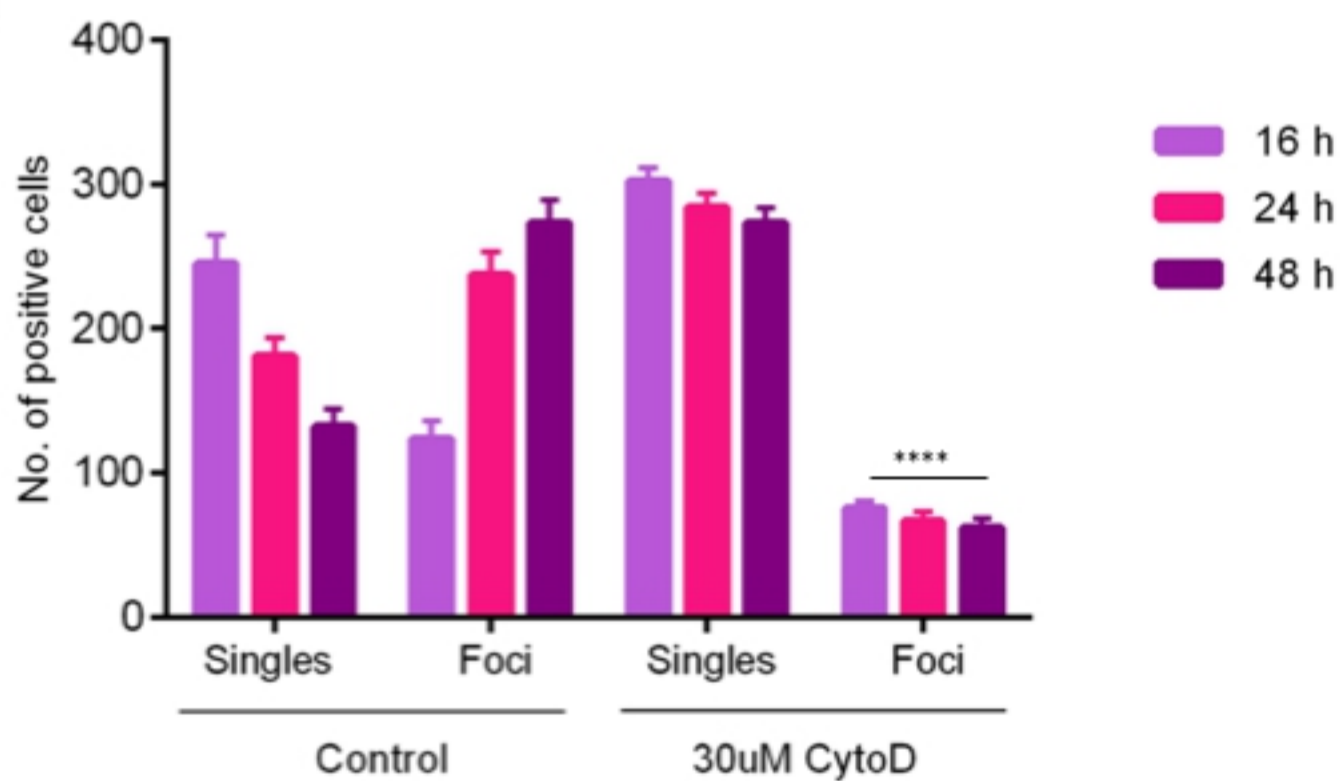

Figure 2

A

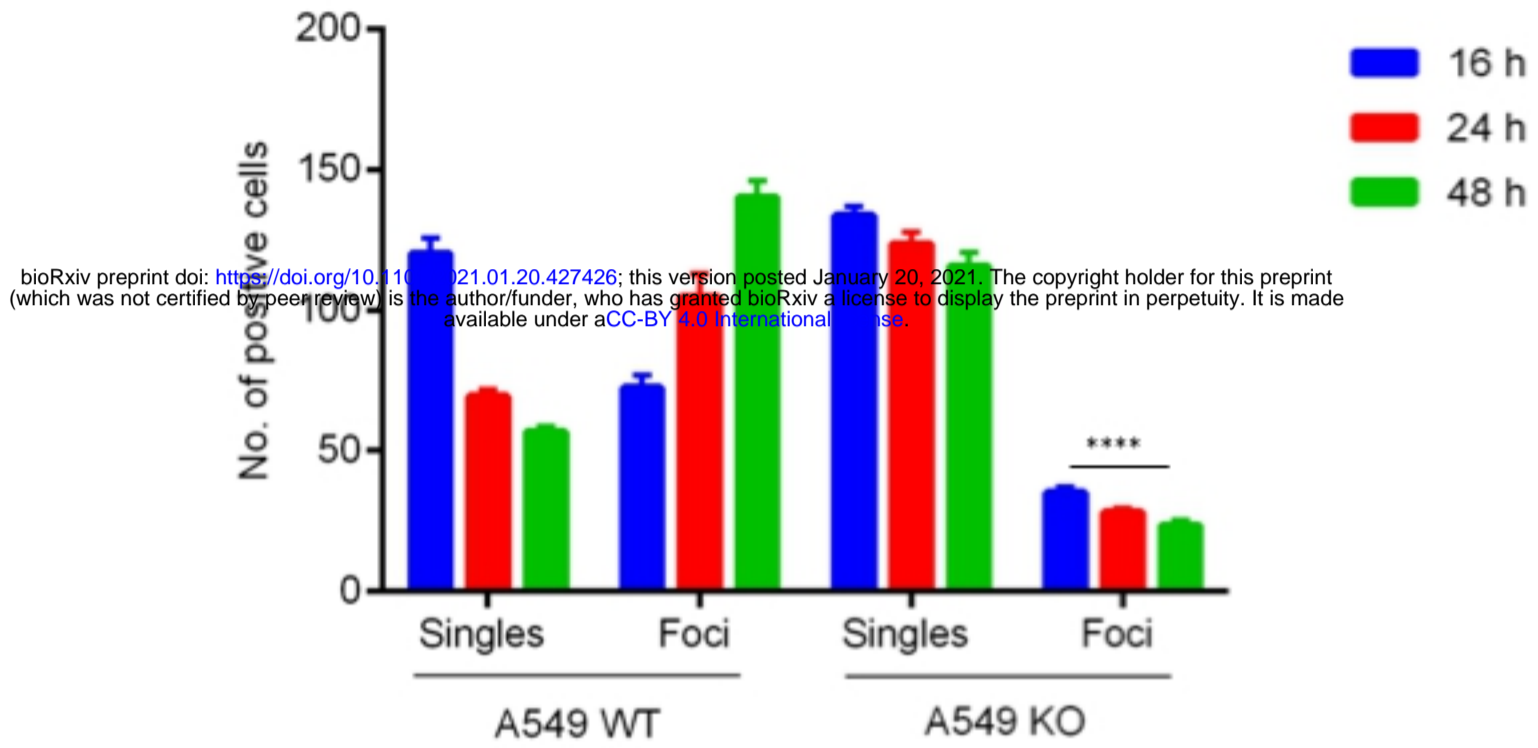

B

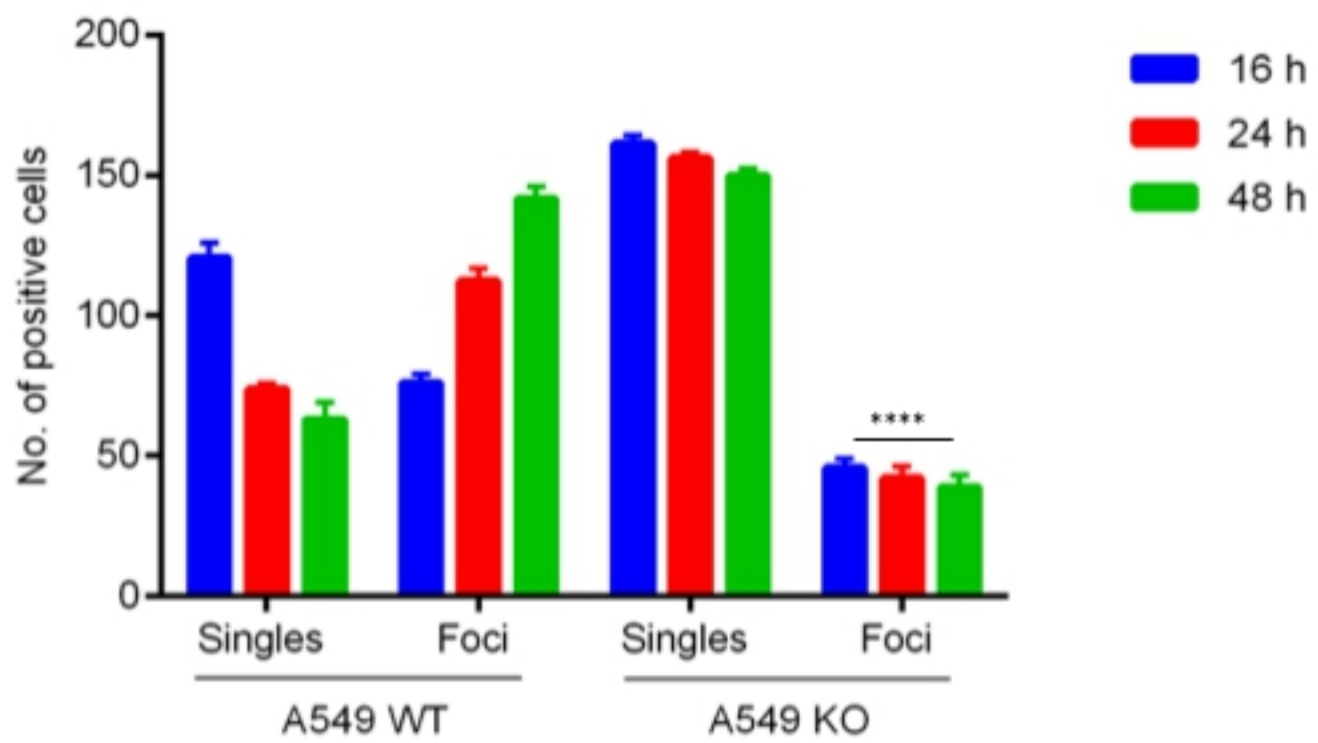

Fig 4

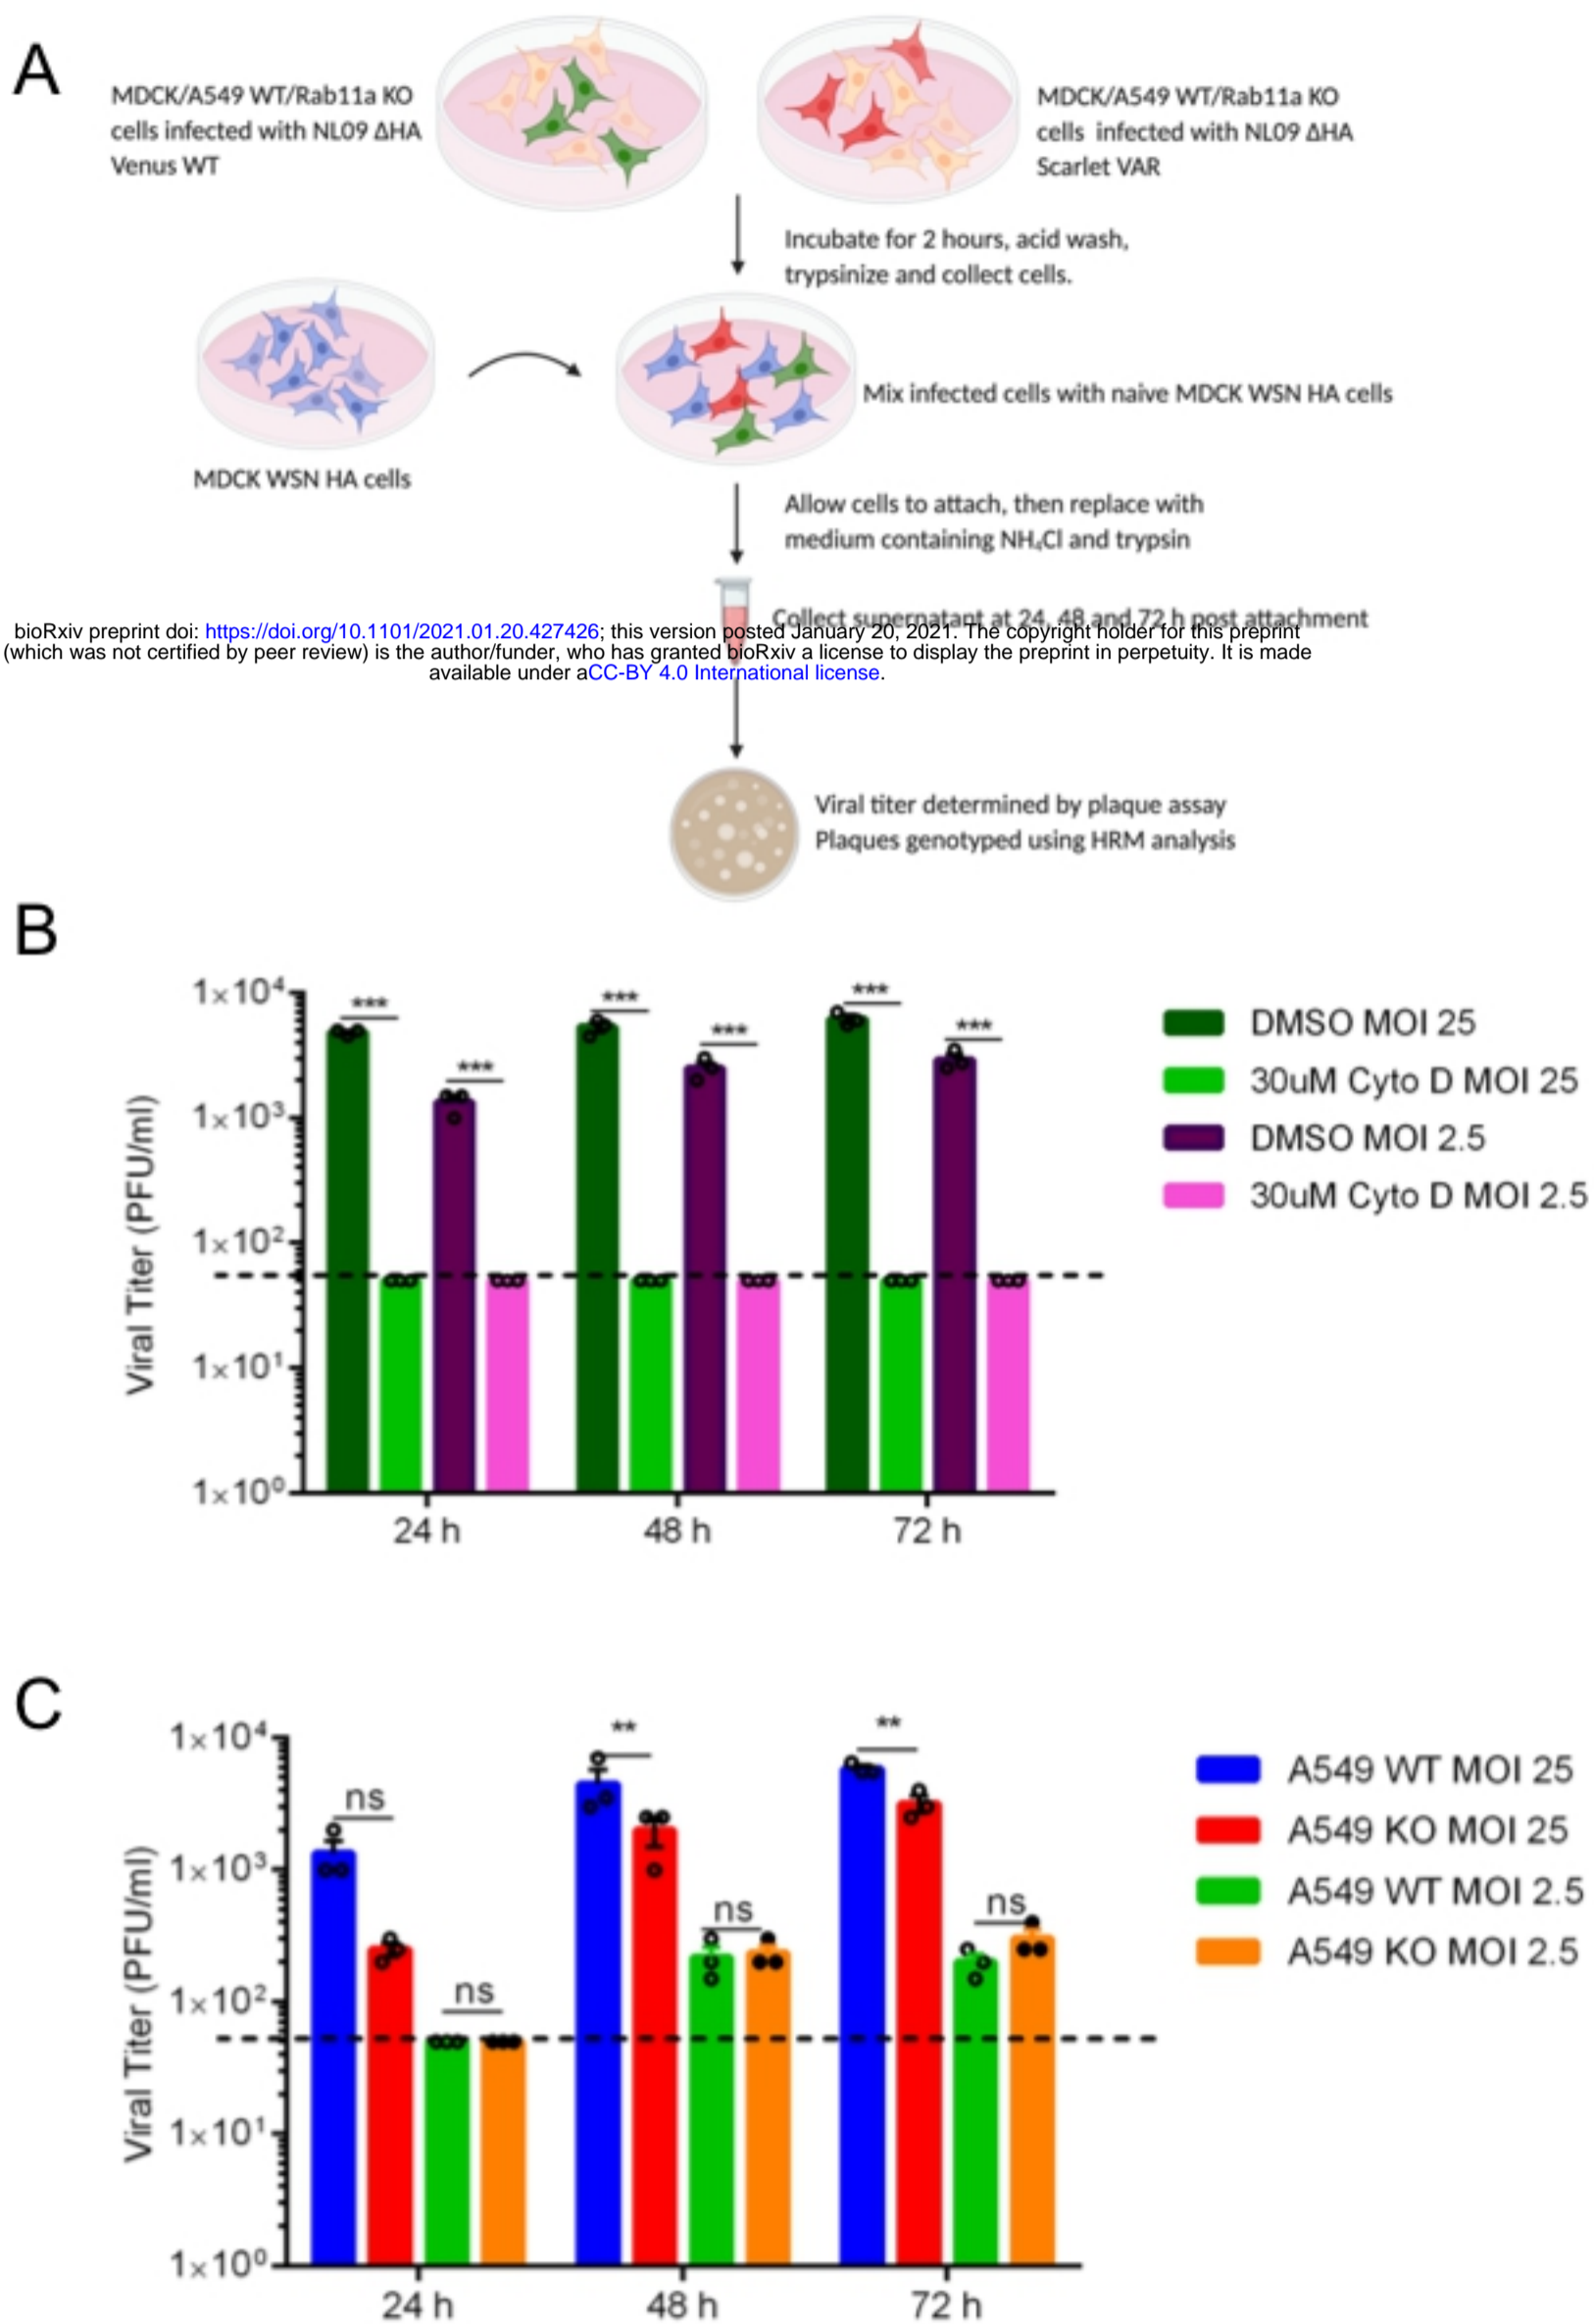

Figure 4



Fig 5

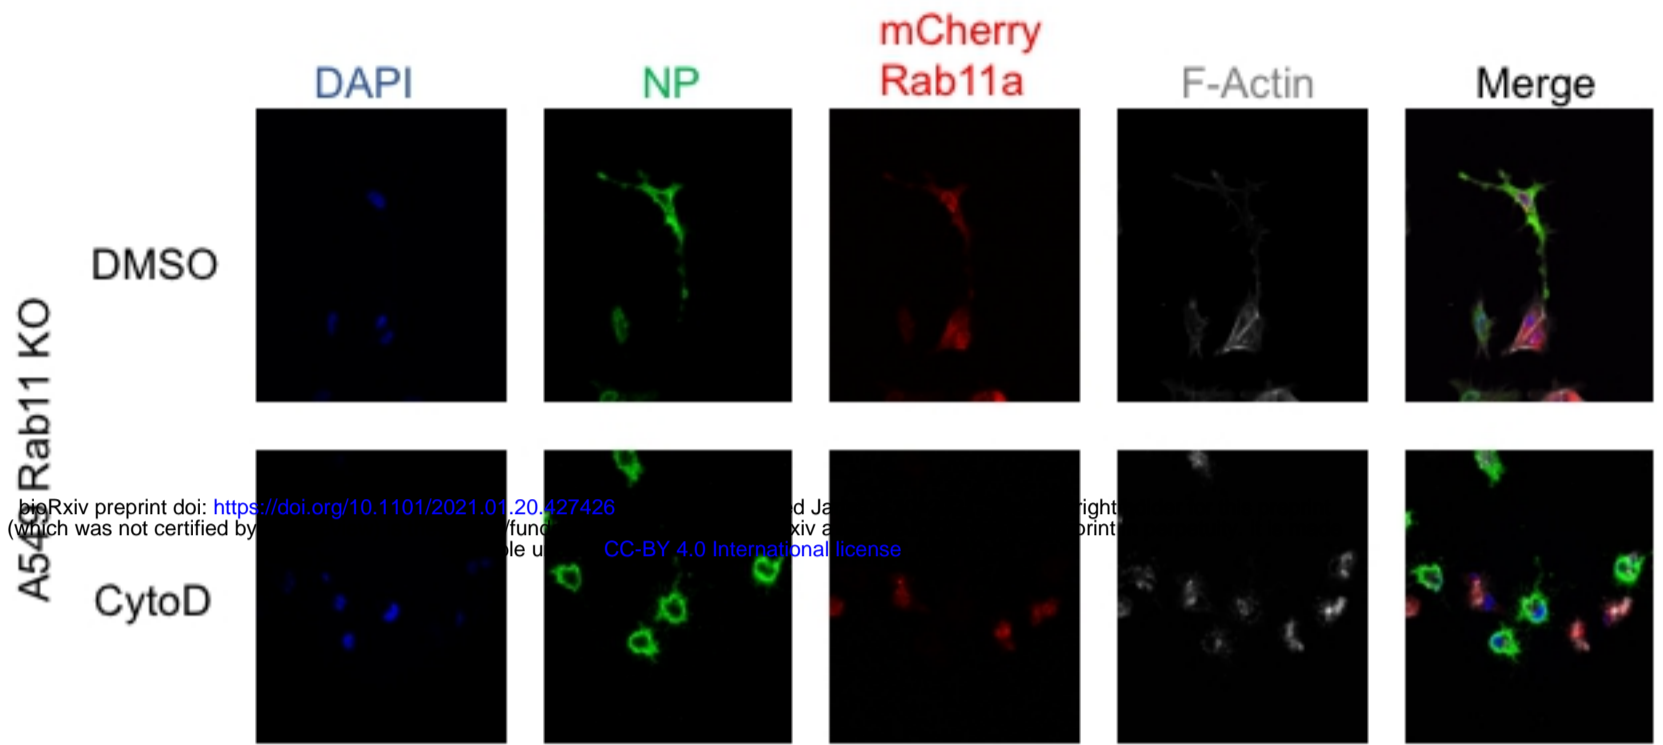

Figure 5

Fig 6

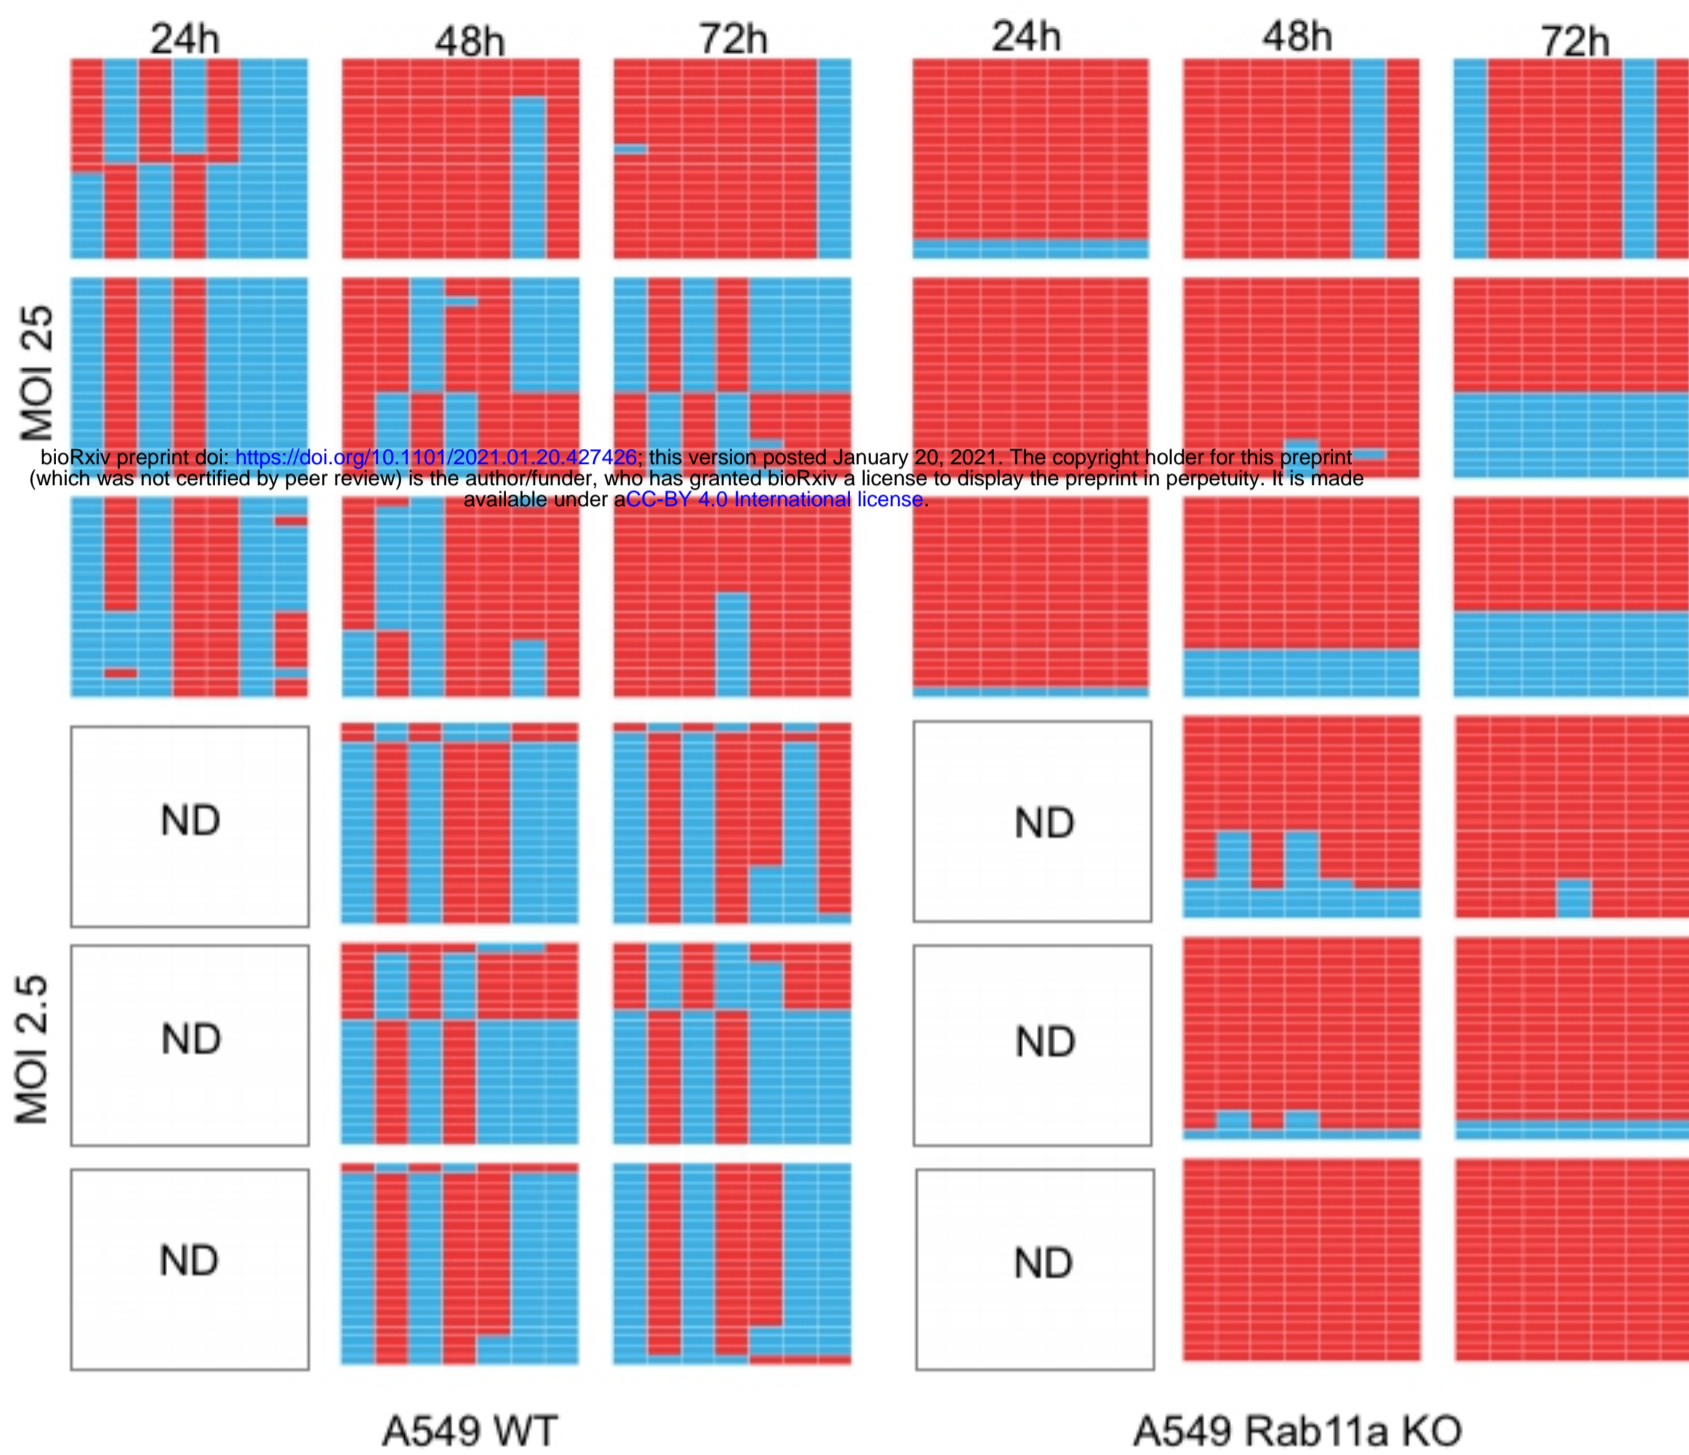

Figure 6

Fig 7

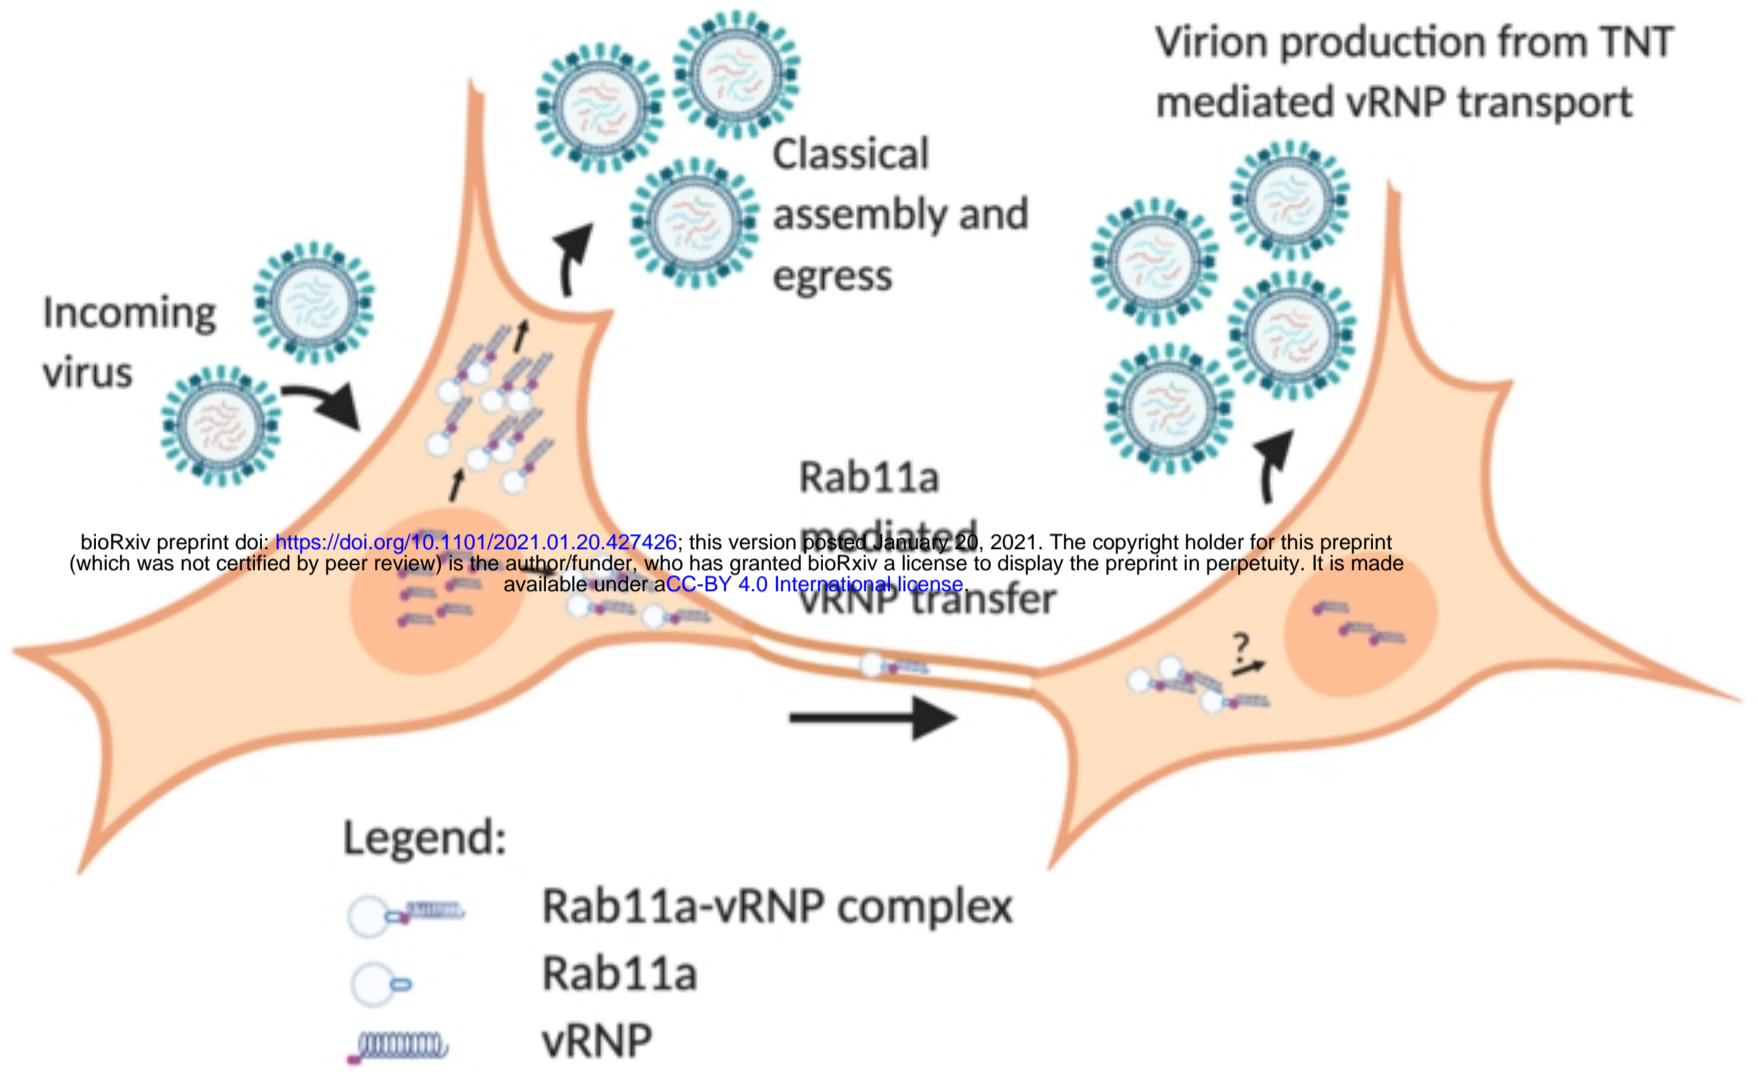

Figure 7
